# Supplementary material
Source: MDPI journal article supplement (https://www.mdpi.com/2073-4433/13/12/2117)
Supplement: s1 [file s1]

Archive with 2 entries (2 files):
- Supplementary file.pdf
- Table_S3.xlsx
