# Supplementary material
Source: MDPI journal article supplement (https://www.mdpi.com/2073-4433/13/12/2117)
Supplement: s1 [file s1 › Table_S3.xlsx]

## Sheet: Table X
Table S3. The 10 most dominant PCB congeners at sites along the River Angara from Listvyanka to Usol'e-Sibirskoe.																(2CL, 3CL, 4CL, 5CL, 6CL, 7CL)
	near the settlemetn of Listvyanka, on the ice of Lake Baikal	st. 42	st. 41	st. 40	st. 39	st. 20	st. 21	st. 7	st. 8	st. 19	st. 18	st. 9	Angarsk-Meget	st. 22	st. 23	Angarsk	st. 24	st. 25	st. 26	st. 27	st. 28	st. 29	st. 31	st. 32	st. 33	st. 34	Sovol **
2003	95/66	101/90	95/66	95/66	101/90			118	118				101/90	101/90	101/90		118	95/66	118		118		138			101/90	110
	101/90	95/66	101/90	101/90	118			101/90	138				118	95/66	118		101/90	101/90	101/90		101/90		101/90			118	138=101
	118	118	52	52	95/66			95/66	110/77				138	118	110/77		110/77	118	110/77		110/77		153			138	118
	110/77	52	110/77	118	110/77			110/77	101/90				95/66	110/77	95/66		105	110/77	138		138		118			110/77	153
	99	110/77	99	110/77	138			138	105				105	99	138		138	99	95/66		52		110/77			105	70
	52	138	118	99	99			105	153				110/77	52	105		95/66	52	105		105		105			153	95
	105	105	44	105	105			99	52				153	138	99		153	105	153		153		95/66			99	105
	138*	99	49	138	52			153	149				52	105	153		99	138	99		149		180			149	52
	44	153	105	44	153			52	44				99	44	149		52	153	52		44		149			52	149
	153	49	149	153	149			149	128				149	153	52		149	149	44		180		99			44	66
2009	95/66	101/90	110/77	95/66	110/77	52			95/66		110/77	118		110/77	118		138	95/66	110/77		118		138			110/77	110
	101/90	44	101/90	153	52	101/90			52		118	110/77		95/66	110/77		118	110/77	95/66		138		153			101/90	138=101
	110/77	110/77	118	118	118	44			101/90		101/90	138		101/90	138		110/77	52	118		153		118			118	118
	118	95/66	153	52	101/90	110/77			110/77		138	101/90		44	101/90		101/90	101/90	101/90		95/66		180			95/66	153
	52	52	52	110/77	99	95/66			44		52	153		52	95/66		153	118	138		101/90		110/77			138	70
	99	138	138	49	44	99			138		153	99		118	153		70/76	99	99		110/77		101/90			52	95
	44	118	95/66	44	153	118			118		99	105		99	105		105	138	52		105		95/66			153	105
	138	99	28	138	138	49			99		95/66	52		138	99		44	153	87/115		99		105			99	52
	87/115	74	105	28	97	153			153		44	87/115		28	87/115		99	74	97		87/115		190/170			44	149
	105	87/115	99	99	74	28			28		105	74		97	52		87/115	44	153		37		128			28	66
2011		101/90				101/90					101/90					101/90				101/90		95/66		95/66			110
		118				95/66					95/66					95/66				118		101/90		118			138=101
		52				52					52					118				95/66		52		52			118
		110/77				110/77					110/77					110/77				110/77		118		110/77			153
		95/66				118					118					99				138		110/77		99			70
		99				99					99					52				99		99		138			95
		138				138					44					138				52		138		74			105
		153				44					138					153				153		44		87/115			52
		70/76				153					87/115					87/115				87/115		70/76		153			149
		87/115				87/115					153					105				105		153		44			66
2016		110/77	110/77	110/77	110/77	110/77	110/77	101/90	101/90	101/90	101/90	101/90		110/77	110/77		52	44	110/77	110/77	110/77	110/77	101/90	52		101/90	110
		101/90	101/90	52	101/90	101/90	101/90	110/77	110/77	110/77	110/77	99		101/90	118		101/90	101/90	52	101/90	101/90	52	110/77	110/77		110/77	138=101
		52	52	101/90	52	52	52	52	52	52	118	110/77		99	101/90		110/77	52	95/66	118	99	101/90	118	95/66		52	118
		99	99	99	99	99	99	99	99	99	99	95/66		52	95/66		99	110/77	101/90	99	52	44	52	101/90		99	153
		118	118	95/66	118	95/66	118	118	118	118	52	118		118	99		95/66	99	99	52	95/66	95/66	95/66	99		95/66	70
		95/66	95/66	118	95/66	118	95/66	95/66	95/66	95/66	95/66	74		95/66	138		118	95/66	118	95/66	138	118	99	118		118	95
		74	74	74	44	44	44	44	138	44	138	138		44	52		44	118	44	44	153	99	138	44		44	105
		44	44	44	74	74	74	74	44	74	74	87/115		74	91		74	87/115	138	138	105	87/115	44	74		74	52
		87/115	138	70/76	87/115	87/115	70/76	138	153	138	44	105		138	153		138	74	74	153	44	31	153	70/76		87/115	149
		138	87/115	87/115	138	70/76	138	87/115	105	153	105	70/76		87/115	105		70/76	138	70/76	87/115	87/115	138	105	138		138	66
2021		28	52	28	28	28	28	101	28	28	28	101		99	28		28	28	28	28	118	28	118	28	28	52	110
		31	101	52	8	31	31	52	31	31	31	52		28	31		31	31	31	31	138	31	138	31	118	101	138=101
		8	99	31	31	8	8	118	52	101	52	99		31	8		118	101	8	8	101	8	110	52	101	28	118
		99	110	101	52	52	52	110	101	52	101	118		8	52		8	52	52	52	110	99	101	101	31	31	153
		52	74	110	101	101	118	99	110	99	110	110		52	118		138	118	44	44	99	52	153	99	110	110	70
		44	118	8	118	44	49	44	99	8	118	74		118	49		52	110	118	49	153	118	99	118	138	99	95
		101	44	118	110	99	44	28	118	110	99	44		110	138		110	99	101	101	52	110	105	110	52	118	105
		49	49	44	99	110	110	74	44	118	44	138		101	110		101	44	110	110	105	138	149	44	99	44	52
		110	97	99	44	49	138	138	8	44	49	28		44	44		44	49	49	118	149	101	52	49	8	49	149
		118	85	74	49	118	101	31	74	49	74	49		138	101		99	74	138	99	44	44	97	74	153	74	66
	* - the underlined congeners and congeners localted above underlined congeners contribut five and more percents in total PCB
	** - [9] Takasuga, T.; Senthilkumar, K.; Matsumura, T.; Shiozaki, K.; Sakai, S. Isotope dilution analysis of polychlorinated biphenyls (PCBs) in transformer oil and global commercial PCB formulations by high resolution gas chromatography–high resolution mass spectrometry. Chemosphere, 2006, 62, pp. 469–484.
